# Supplementary material
Source: Elsevier journal article supplement (https://www.sciencedirect.com/science/article/pii/S0301054619301193)
Supplement: mmc1 [file S0301054619301193:mmc1.docx]

| **Patient No** | **Age (years)** | **Gender** | **Suspected foods (n=41)** | | **SPT positive** | **SPT negative** | **PFS with at least one food was confirmed** |
| --- | --- | --- | --- | --- | --- | --- | --- |
| **Associated with anaphylaxis (n=2)** | **Associated with isolated oropharyngeal symptoms (n=20)** |
| 1 | 7.5 | Male | 1.Peach |  | 1 | - | **Yes** |
| 2 | 16.4 | Female | 1.Peach 2.Apple 3.Cherry |  | 1, 2, 3 | - | **Yes** |
| 3 | 6.1 | Male |  | 1.Cucumber 2.Tomato 3.Potato | 2, 3 | 1 | **Yes** |
| 4 | 7.5 | Male |  | 1.Peach | 1 | - | **Yes** |
| 5 | 7.6 | Female |  | 1.Kiwifruit 2.Pineapple | 1 | 2 | **Yes** |
| 6 | 8.5 | Female |  | 1.Kiwifruit | - | 1 | **Yes** |
| 7 | 8.9 | Female |  | 1.Strawberry 2.Tomato | 2 | 1 | **Yes** |
| 8 | 9 | Male |  | 1.Banana | 1 | - | **Yes** |
| 9 | 11 | Female |  | 1.Kiwifruit 2.Strawberry 3.Peach 4.Apricot | 2, 4 | 1, 3 | **Yes** |
| 10 | 11.08 | Male |  | 1.Melon 2.Watermelon 3.Tomato | 2 | 1, 3 | **Yes** |
| 11 | 11.2 | Female |  | 1.Peach | 1 | - | **Yes** |
| 12 | 13.5 | Male |  | 1.Peach | 1 | - | **Yes** |
| 13 | 15.4 | Female |  | 1.Kiwifruit | 1 | - | **Yes** |
| 14 | 15.5 | Male |  | 1.Peach | 1 | - | **Yes** |
| 15 | 16.1 | Female |  | 1.Cucumber | 1 | - | **Yes** |
| 16 | 16.2 | Female |  | 1.Melon 2.Watermelon 3.Pomegranate 4.Plum | 3 | 1, 2, 4 | **Yes** |
| 17 | 17.6 | Female |  | 1.Kiwifruit 2.Peach 3.Banana | 1, 3 | 2 | **Yes** |
| 18 | 17,7 | Female |  | 1.Pomegranate | 1 | - | **Yes** |
| 19 | 17.8 | Female |  | 1.Peach 2.Tomato 3.Strawberry 4.Orange | 1, 2, 4 | 3 | **Yes** |
| 20 | 17 | Female |  | 1.Orange | - | 1 | **No** |
| 21 | 14.9 | Male |  | 1.Banana | - | 1 | **No** |
| 22 | 10 | Male |  | 1.Tomatoes | - | 1 | **No** |

**eTable 1: Patients with PFS**

SPT: Skin prick test
